# Supplementary material for: Development of an Automated Optical Inspection System for Rapidly and Precisely Measuring Dimensions of Embedded Microchannel Structures in Transparent Bonded Chips
Source: MDPI journal article supplement (doi:10.3390/s21030698), 2021-01-20
Supplement: s1 [file s1]

# Supplementary File

## Development of an Automated Optical Inspection System for Rapidly and Precisely Measuring Dimensions of Embedded Microchannel Structures in Transparent Bonded Chips

Pin-Chuan Chen <sup>1,2,\*</sup>, Ya-Ting Lin <sup>1</sup>, Chi-Minh Truong <sup>1</sup>, Pai-Shan Chen <sup>3</sup> and Huihua-Kenny Chiang <sup>4,\*</sup>

### 1. Scale Converting Factor Determination (Pixel to $\mu\text{m}$ )

The purpose of this section is to determine the Scale Converting Factor from pixel to  $\mu\text{m}$ . First, the camera is set perfectly perpendicular to the chip holding base. Then a standardized ruler is placed on the holding X-Y base position. Figure S1 shows the Standardized ruler and its image through the camera.

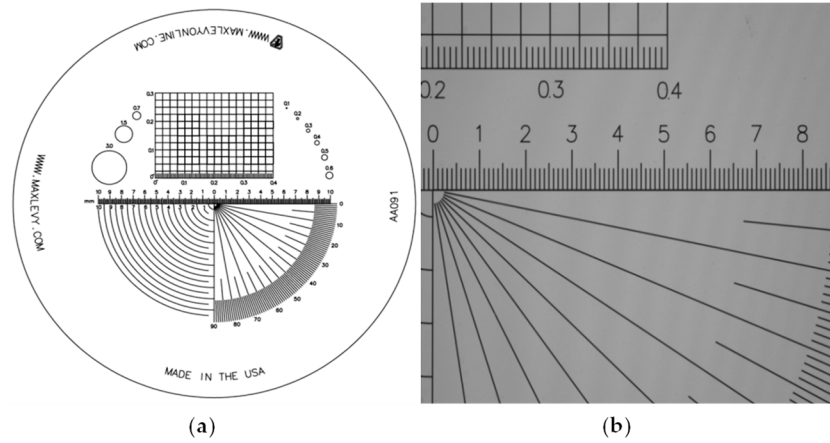

**Figure S1.** (a) Standardized ruler; (b) Standardized ruler image from 0 to 8 mm taken by CMOS black-and-white industrial camera.

Through Figure S1(b) we can observe the ruler. Using NI vision Assistant the distance from point 0 to 8 mm can be determined in the pixel scale. We collect the distance from 10 pictures similar to the above to determine the length of 8 mm (8000  $\mu\text{m}$ ) in pixel scale.

The Scale Converting Factor from the pixel unit to  $\mu\text{m}$  is determined by dividing 8000  $\mu\text{m}$  by the corresponding average pixel value in the following equation (1).

$$\text{Scale Converting Factor} = \frac{\text{Length in } \mu\text{m}}{\text{Length in pixel}} = \frac{8000}{2175.92} = 3.68 \left( \frac{\mu\text{m}}{\text{pixel}} \right) \quad (1)$$

**Table S1.** Standardized ruler length in pixel and Scale Converting Factor

|                |                |
|----------------|----------------|
| Measurement 1  | 2175.92 Pixels |
| Measurement 2  | 2175.92 Pixels |
| Measurement 3  | 2175.93 Pixels |
| Measurement 4  | 2175.90 Pixels |
| Measurement 5  | 2175.92 Pixels |
| Measurement 6  | 2175.96 Pixels |
| Measurement 7  | 2175.91 Pixels |
| Measurement 8  | 2175.90 Pixels |
| Measurement 9  | 2175.93 Pixels |
| Measurement 10 | 2175.95 Pixels |
| Average        | 2175.92 Pixels |

|                               |                                 |
|-------------------------------|---------------------------------|
| Real length ( $\mu\text{m}$ ) | 8000 $\mu\text{m}$              |
| Scale converting factor       | 3.68 $\mu\text{m}/\text{pixel}$ |

**Table S2:** Camera view in different setting angle

| Camera angle (Degree) | View                                                                                | Camera angle (Degree) | View                                                                                 |
|-----------------------|-------------------------------------------------------------------------------------|-----------------------|--------------------------------------------------------------------------------------|
| 0                     | 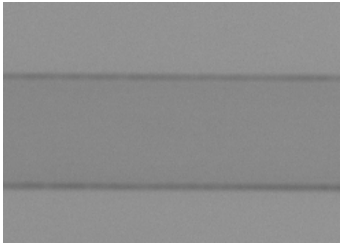   | 25                    |    |
| 5                     |   | 30                    |   |
| 10                    |  | 35                    |  |
| 15                    |  | 40                    |  |
| 20                    |  | 45                    |  |

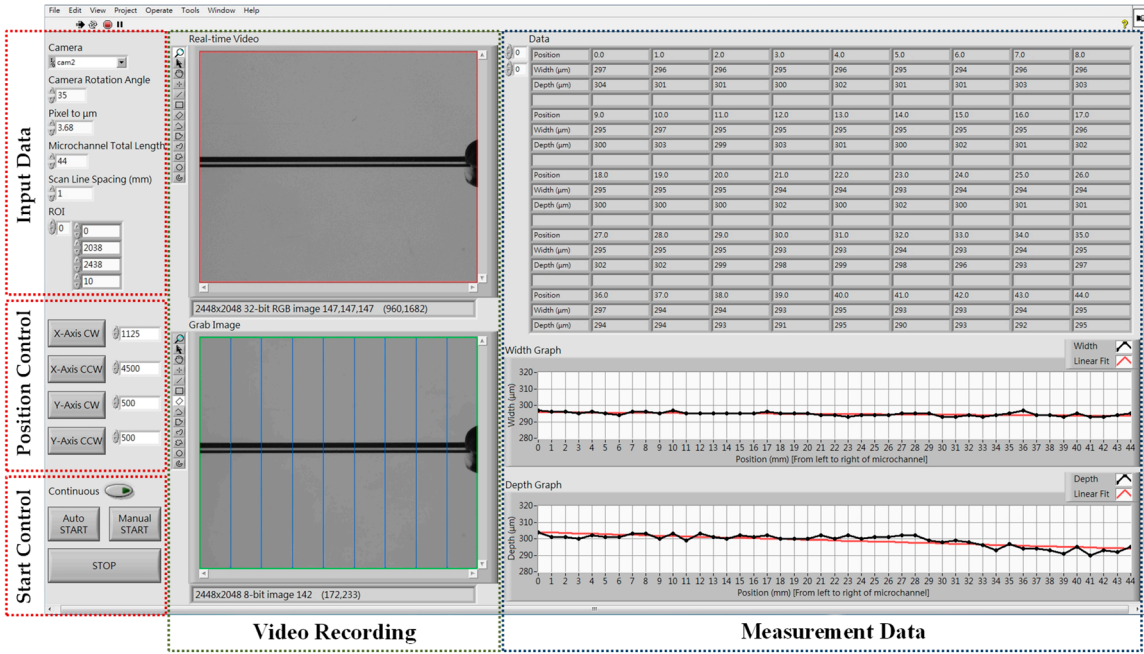

Figure S2. Human-Machine Interface (HMI).
